# Supplementary material for: Composition and Long-Term Variation Characteristics of Coral Reef Fish Species in Yongle Atoll, Xisha Islands, China
Source: MDPI journal article supplement (doi:10.3390/biology12081062), 2023-07-28
Supplement: s1 [file s1]

Table S1: The checklist of coral reef fishes in Yongle Atoll.

| No.                   | Class, Order, Family, Genus, Species | IUCN | Feeding habits | Habitat    |
|-----------------------|--------------------------------------|------|----------------|------------|
| <b>Actinopterygii</b> |                                      |      |                |            |
| <b>Anguilliformes</b> |                                      |      |                |            |
| Congridae             |                                      |      |                |            |
| <b>Conger</b>         |                                      |      |                |            |
| 1                     | <i>Conger japonicus</i>              | NE   | Carnivore      | DEM        |
| Muraenidae            |                                      |      |                |            |
| <b>Echidna</b>        |                                      |      |                |            |
| 2                     | <i>Echidna nebulosa</i>              | LC   | Carnivore      | RFA        |
| 3                     | <i>Echidna polyzona</i>              | LC   | Carnivore      | RFA        |
| <b>Gymnothorax</b>    |                                      |      |                |            |
| 4                     | <i>Gymnothorax albimarginatus</i>    | LC   | Carnivore      | RFA        |
| 5                     | <i>Gymnothorax fimbriatus</i>        | LC   | Carnivore      | BRA;RFA    |
| 6                     | <i>Gymnothorax isingteena</i>        | LC   | Carnivore      | RFA        |
| 7                     | <i>Gymnothorax javanicus</i>         | LC   | Carnivore      | RFA        |
| 8                     | <i>Gymnothorax meleagris</i>         | LC   | Carnivore      | BRA;RFA    |
| 9                     | <i>Gymnothorax neglectus</i>         | LC   | Carnivore      | DEM        |
| 10                    | <i>Gymnothorax pictus</i>            | LC   | Carnivore      | BRA;RFA    |
| 11                    | <i>Gymnothorax richardsonii</i>      | LC   | Carnivore      | RFA        |
| 12                    | <i>Gymnothorax rueppellii</i>        | LC   | Carnivore      | BRA;RFA    |
| 13                    | <i>Gymnothorax thyrsoideus</i>       | LC   | Carnivore      | RFA        |
| 14                    | <i>Gymnothorax undulatus</i>         | LC   | Carnivore      | BRA;RFA    |
| <b>Scuticaria</b>     |                                      |      |                |            |
| 15                    | <i>Scuticaria tigrina</i>            | LC   | Carnivore      | RFA        |
| Ophichthidae          |                                      |      |                |            |
| <b>Myrichthys</b>     |                                      |      |                |            |
| 16                    | <i>Myrichthys colubrinus</i>         | NE   | Carnivore      | RFA        |
| 17                    | <i>Myrichthys maculosus</i>          | NE   | Carnivore      | RFA        |
| <b>Aulopiformes</b>   |                                      |      |                |            |
| Synodontidae          |                                      |      |                |            |
| <b>Synodus</b>        |                                      |      |                |            |
| 18                    | <i>Synodus variegatus</i>            | LC   | Carnivore      | RFA        |
| <b>Beloniformes</b>   |                                      |      |                |            |
| Belonidae             |                                      |      |                |            |
| <b>Strongylura</b>    |                                      |      |                |            |
| 19                    | <i>Strongylura incisa</i>            | NE   | Carnivore      | RFA        |
| <b>Tylosurus</b>      |                                      |      |                |            |
| 20                    | <i>Tylosurus melanotus</i>           | NE   | Carnivore      | BRA;RFA;OD |
| Exocoetidae           |                                      |      |                |            |
| <b>Cheilopogon</b>    |                                      |      |                |            |
| 21                    | <i>Cheilopogon cyanopterus</i>       | LC   | Carnivore      | PELO;OD    |
| <b>Parexocoetus</b>   |                                      |      |                |            |

| No. | Class, Order, Family, Genus, Species                                        | IUCN | Feeding habits | Habitat |
|-----|-----------------------------------------------------------------------------|------|----------------|---------|
| 22  | <i>Parexocoetus brachypterus</i><br>Hemiramphidae                           | NE   | Carnivore      | PE;OD   |
|     | <b>Hyporhamphus</b>                                                         |      |                |         |
| 23  | <i>Hyporhamphus dussumieri</i><br><b>Beryciformes</b><br>Holocentridae      | NE   | Carnivore      | RFA     |
|     | <b>Myripristis</b>                                                          |      |                |         |
| 24  | <i>Myripristis kuntzei</i>                                                  | LC   | Carnivore      | RFA     |
| 25  | <i>Myripristis murdjan</i>                                                  | LC   | Carnivore      | RFA     |
| 26  | <i>Myripristis pralinia</i>                                                 | LC   | Carnivore      | RFA     |
| 27  | <i>Myripristis violacea</i>                                                 | LC   | Carnivore      | RFA     |
| 28  | <i>Myripristis vittata</i><br><b>Neoniphon</b>                              | LC   | Carnivore      | RFA     |
| 29  | <i>Neoniphon opercularis</i>                                                | LC   | Carnivore      | RFA     |
| 30  | <i>Neoniphon sammara</i><br><b>Ostichthys</b>                               | LC   | Carnivore      | RFA     |
| 31  | <i>Ostichthys kaianus</i><br><b>Sargocentron</b>                            | LC   | Carnivore      | BAD     |
| 32  | <i>Sargocentron caudimaculatum</i>                                          | LC   | Carnivore      | RFA     |
| 33  | <i>Sargocentron diadema</i>                                                 | LC   | Carnivore      | RFA     |
| 34  | <i>Sargocentron ensifer</i>                                                 | LC   | Carnivore      | RFA     |
| 35  | <i>Sargocentron melanospilos</i>                                            | LC   | Carnivore      | RFA     |
| 36  | <i>Sargocentron punctatissimum</i>                                          | LC   | Carnivore      | RFA     |
| 37  | <i>Sargocentron spiniferum</i><br><b>Gasterosteiformes</b><br>Fistulariidae | LC   | Carnivore      | RFA     |
|     | <b>Fistularia</b>                                                           |      |                |         |
| 38  | <i>Fistularia commersonii</i><br>Syngnathidae                               | LC   | Carnivore      | RFA     |
|     | <b>Corythoichthys</b>                                                       |      |                |         |
| 39  | <i>Corythoichthys flavofasciatus</i><br><b>Doryrhamphus</b>                 | LC   | Carnivore      | RFA     |
| 40  | <i>Doryrhamphus excisus</i><br><b>Mugiliformes</b><br>Mugilidae             | LC   | Carnivore      | RFA     |
|     | <b>Oedalechilus</b>                                                         |      |                |         |
| 41  | <i>Oedalechilus labiosus</i><br><b>Ophidiiformes</b><br>Carapidae           | NE   | Omnivore       | RFA     |
|     | <b>Encheliophis</b>                                                         |      |                |         |
| 42  | <i>Encheliophis homei</i><br><b>Perciformes</b><br>Acanthuridae             | LC   | Carnivore      | RFA     |

| No.                   | Class, Order, Family, Genus, Species  | IUCN | Feeding habits | Habitat |
|-----------------------|---------------------------------------|------|----------------|---------|
| <b>Acanthurus</b>     |                                       |      |                |         |
| 43                    | <i>Acanthurus dussumieri</i>          | LC   | Herbivore      | RFA     |
| 44                    | <i>Acanthurus gahhm</i>               | LC   | Herbivore      | RFA     |
| 45                    | <i>Acanthurus japonicus</i>           | LC   | Herbivore      | RFA     |
| 46                    | <i>Acanthurus lineatus</i>            | LC   | Herbivore      | RFA     |
| 47                    | <i>Acanthurus mata</i>                | LC   | Herbivore      | RFA     |
| 48                    | <i>Acanthurus nigrofusus</i>          | LC   | Herbivore      | RFA     |
| 49                    | <i>Acanthurus olivaceus</i>           | LC   | Herbivore      | RFA     |
| 50                    | <i>Acanthurus thompsoni</i>           | LC   | Herbivore      | BRA;RFA |
| 51                    | <i>Acanthurus triostegus</i>          | LC   | Herbivore      | RFA     |
| 52                    | <i>Acanthurus xanthopterus</i>        | LC   | Herbivore      | RFA     |
| <b>Ctenochaetus</b>   |                                       |      |                |         |
| 53                    | <i>Ctenochaetus binotatus</i>         | LC   | Herbivore      | RFA     |
| 54                    | <i>Ctenochaetus striatus</i>          | LC   | Herbivore      | RFA     |
| <b>Naso</b>           |                                       |      |                |         |
| 55                    | <i>Naso annulatus</i>                 | LC   | Herbivore      | RFA     |
| 56                    | <i>Naso brevirostris</i>              | LC   | Herbivore      | RFA     |
| 57                    | <i>Naso hexacanthus</i>               | LC   | Herbivore      | BRA;RFA |
| 58                    | <i>Naso lituratus</i>                 | LC   | Herbivore      | RFA     |
| 59                    | <i>Naso thynnoides</i>                | LC   | Herbivore      | RFA     |
| 60                    | <i>Naso unicornis</i>                 | LC   | Herbivore      | RFA     |
| 61                    | <i>Naso vlamingii</i>                 | LC   | Herbivore      | RFA     |
| <b>Zebrasoma</b>      |                                       |      |                |         |
| 62                    | <i>Zebrasoma flavescens</i>           | LC   | Herbivore      | RFA     |
| 63                    | <i>Zebrasoma velifer</i>              | LC   | Herbivore      | RFA     |
| Apogonidae            |                                       |      |                |         |
| <b>Cheilodipterus</b> |                                       |      |                |         |
| 64                    | <i>Cheilodipterus quinquelineatus</i> | NE   | Carnivore      | RFA     |
| <b>Gymnapogon</b>     |                                       |      |                |         |
| 65                    | <i>Gymnapogon philippinus</i>         | NE   | Carnivore      | RFA     |
| Blenniidae            |                                       |      |                |         |
| <b>Aspidontus</b>     |                                       |      |                |         |
| 66                    | <i>Aspidontus tractus</i>             | LC   | Omnivore       | RFA     |
| <b>Blenniella</b>     |                                       |      |                |         |
| 67                    | <i>Blenniella periophthalmus</i>      | LC   | Omnivore       | RFA     |
| <b>Istiblennius</b>   |                                       |      |                |         |
| 68                    | <i>Istiblennius edentulus</i>         | LC   | Omnivore       | BRA;RFA |
| <b>Salarias</b>       |                                       |      |                |         |
| 69                    | <i>Salarias fasciatus</i>             | LC   | Omnivore       | BRA;RFA |
| Caesionidae           |                                       |      |                |         |
| <b>Caesio</b>         |                                       |      |                |         |
| 70                    | <i>Caesio caerulea</i>                | LC   | Carnivore      | RFA     |
| 71                    | <i>Caesio lunaris</i>                 | LC   | Carnivore      | RFA     |

| No. | Class, Order, Family, Genus, Species | IUCN | Feeding habits | Habitat     |
|-----|--------------------------------------|------|----------------|-------------|
|     | <b>Pterocaesio</b>                   |      |                |             |
| 72  | <i>Pterocaesio digramma</i>          | LC   | Carnivore      | RFA         |
| 73  | <i>Pterocaesio tile</i>              | LC   | Carnivore      | RFA         |
|     | Carangidae                           |      |                |             |
|     | <b>Carangoides</b>                   |      |                |             |
| 74  | <i>Carangoides ferdau</i>            | LC   | Carnivore      | BRA;RFA     |
|     | <b>Caranx</b>                        |      |                |             |
| 75  | <i>Caranx ignobilis</i>              | LC   | Carnivore      | BRA;RFA     |
| 76  | <i>Caranx lugubris</i>               | LC   | Carnivore      | BEP;OD      |
| 77  | <i>Caranx melampygus</i>             | LC   | Carnivore      | BRA;RFA     |
| 78  | <i>Caranx sexfasciatus</i>           | LC   | Carnivore      | BRA;RFA;AMP |
|     | <b>Decapterus</b>                    |      |                |             |
| 79  | <i>Decapterus macrosoma</i>          | LC   | Carnivore      | RFA         |
|     | <b>Scomberoides</b>                  |      |                |             |
| 80  | <i>Scomberoides lysan</i>            | LC   | Carnivore      | BRA;RFA     |
|     | <b>Selar</b>                         |      |                |             |
| 81  | <i>Selar crumenophthalmus</i>        | LC   | Carnivore      | RFA         |
|     | <b>Selaroides</b>                    |      |                |             |
| 82  | <i>Selaroides leptolepis</i>         | LC   | Carnivore      | BRA;RFA;AMP |
|     | <b>Seriola</b>                       |      |                |             |
| 83  | <i>Seriola lalandi</i>               | LC   | Carnivore      | BRA;BEP     |
| 84  | <i>Seriola quinqueradiata</i>        | LC   | Carnivore      | DEM;OD      |
|     | <b>Trachinotus</b>                   |      |                |             |
| 85  | <i>Trachinotus baillonii</i>         | LC   | Carnivore      | BRA;RFA     |
|     | Chaetodontidae                       |      |                |             |
|     | <b>Chaetodon</b>                     |      |                |             |
| 86  | <i>Chaetodon auriga</i>              | LC   | Omnivore       | RFA         |
| 87  | <i>Chaetodon auripes</i>             | LC   | Omnivore       | RFA         |
| 88  | <i>Chaetodon citrinellus</i>         | LC   | Omnivore       | RFA         |
| 89  | <i>Chaetodon ephippium</i>           | LC   | Omnivore       | RFA         |
| 90  | <i>Chaetodon falcula</i>             | LC   | Omnivore       | RFA         |
| 91  | <i>Chaetodon kleinii</i>             | LC   | Omnivore       | RFA         |
| 92  | <i>Chaetodon lineolatus</i>          | LC   | Omnivore       | RFA         |
| 93  | <i>Chaetodon lunula</i>              | LC   | Omnivore       | RFA         |
| 94  | <i>Chaetodon lunulatus</i>           | LC   | Omnivore       | RFA         |
| 95  | <i>Chaetodon madagaskariensis</i>    | LC   | Omnivore       | RFA         |
| 96  | <i>Chaetodon melannotus</i>          | LC   | Omnivore       | RFA         |
| 97  | <i>Chaetodon ornatissimus</i>        | LC   | Omnivore       | RFA         |
| 98  | <i>Chaetodon rafflesii</i>           | LC   | Omnivore       | BRA;RFA     |
| 99  | <i>Chaetodon semeion</i>             | LC   | Omnivore       | RFA         |
| 100 | <i>Chaetodon speculum</i>            | LC   | Omnivore       | RFA         |
| 101 | <i>Chaetodon trifascialis</i>        | NT   | Omnivore       | RFA         |
| 102 | <i>Chaetodon trifasciatus</i>        | LC   | Omnivore       | RFA         |

| No. | Class, Order, Family, Genus, Species | IUCN | Feeding habits | Habitat     |
|-----|--------------------------------------|------|----------------|-------------|
| 103 | <i>Chaetodon unimaculatus</i>        | LC   | Omnivore       | RFA         |
| 104 | <i>Chaetodon vagabundus</i>          | LC   | Omnivore       | RFA         |
| 105 | <i>Chaetodon wiebeli</i>             | LC   | Omnivore       | RFA         |
|     | <b>Forcipiger</b>                    |      |                |             |
| 106 | <i>Forcipiger flavissimus</i>        | LC   | Omnivore       | RFA         |
| 107 | <i>Forcipiger longirostris</i>       | LC   | Carnivore      | RFA         |
|     | <b>Heniochus</b>                     |      |                |             |
| 108 | <i>Heniochus acuminatus</i>          | LC   | Omnivore       | BRA;RFA     |
| 109 | <i>Heniochus chrysostomus</i>        | LC   | Omnivore       | RFA         |
| 110 | <i>Heniochus singularius</i>         | LC   | Omnivore       | RFA         |
|     | Cirrhitidae                          |      |                |             |
|     | <b>Cirrhitus</b>                     |      |                |             |
| 111 | <i>Cirrhitus pinnulatus</i>          | LC   | Carnivore      | RFA         |
|     | Ephippidae                           |      |                |             |
|     | <b>Platax</b>                        |      |                |             |
| 112 | <i>Platax orbicularis</i>            | LC   | Carnivore      | BRA;RFA     |
|     | Gempylidae                           |      |                |             |
|     | <b>Rexea</b>                         |      |                |             |
| 113 | <i>Rexea prometheoides</i>           | NE   | Carnivore      | BEP         |
|     | <b>Ruvettus</b>                      |      |                |             |
| 114 | <i>Ruvettus pretiosus</i>            | LC   | Carnivore      | BEP;OD      |
|     | <b>Thyrsitoides</b>                  |      |                |             |
| 115 | <i>Thyrsitoides marleyi</i>          | NE   | Carnivore      | BEP         |
|     | Gerreidae                            |      |                |             |
|     | <b>Gerres</b>                        |      |                |             |
| 116 | <i>Gerres filamentosus</i>           | LC   | Carnivore      | BRA;DEM;AMP |
|     | Haemulidae                           |      |                |             |
|     | <b>Plectorhinchus</b>                |      |                |             |
| 117 | <i>Plectorhinchus chaetodonoides</i> | NE   | Carnivore      | BRA;RFA     |
| 118 | <i>Plectorhinchus diagrammus</i>     | NE   | Carnivore      | RFA         |
| 119 | <i>Plectorhinchus lineatus</i>       | NE   | Carnivore      | RFA         |
| 120 | <i>Plectorhinchus picus</i>          | NE   | Carnivore      | RFA         |
| 121 | <i>Plectorhinchus vittatus</i>       | LC   | Carnivore      | RFA         |
|     | Kyphosidae                           |      |                |             |
|     | <b>Kyphosus</b>                      |      |                |             |
| 122 | <i>Kyphosus cinerascens</i>          | LC   | Herbivore      | RFA         |
| 123 | <i>Kyphosus vaigiensis</i>           | LC   | Herbivore      | RFA;OD      |
|     | Labridae                             |      |                |             |
|     | <b>Anampses</b>                      |      |                |             |
| 124 | <i>Anampses caeruleopunctatus</i>    | LC   | Carnivore      | RFA         |
|     | <b>Bodianus</b>                      |      |                |             |
| 125 | <i>Bodianus axillaris</i>            | LC   | Carnivore      | RFA         |
| 126 | <i>Bodianus macrourus</i>            | LC   | Carnivore      | RFA         |

| No. | Class, Order, Family, Genus, Species | IUCN | Feeding habits | Habitat |
|-----|--------------------------------------|------|----------------|---------|
| 127 | <i>Bodianus oxycephalus</i>          | DD   | Carnivore      | RFA     |
|     | <b>Cheilinus</b>                     |      |                |         |
| 128 | <i>Cheilinus chlorourus</i>          | LC   | Carnivore      | RFA     |
| 129 | <i>Cheilinus fasciatus</i>           | LC   | Carnivore      | RFA     |
| 130 | <i>Cheilinus trilobatus</i>          | LC   | Carnivore      | BRA;RFA |
| 131 | <i>Cheilinus undulatus</i>           | EN   | Carnivore      | RFA     |
|     | <b>Coris</b>                         |      |                |         |
| 132 | <i>Coris gaimard</i>                 | LC   | Carnivore      | RFA     |
|     | <b>Cymolutes</b>                     |      |                |         |
| 133 | <i>Cymolutes lecluse</i>             | LC   | Carnivore      | RFA     |
|     | <b>Epibulus</b>                      |      |                |         |
| 134 | <i>Epibulus insidiator</i>           | LC   | Carnivore      | RFA     |
|     | <b>Gomphosus</b>                     |      |                |         |
| 135 | <i>Gomphosus varius</i>              | LC   | Carnivore      | RFA     |
|     | <b>Halichoeres</b>                   |      |                |         |
| 136 | <i>Halichoeres chloropterus</i>      | LC   | Carnivore      | RFA     |
| 137 | <i>Halichoeres hortulanus</i>        | LC   | Carnivore      | RFA     |
| 138 | <i>Halichoeres marginatus</i>        | LC   | Carnivore      | RFA     |
| 139 | <i>Halichoeres prosopion</i>         | LC   | Carnivore      | RFA     |
| 140 | <i>Halichoeres trimaculatus</i>      | LC   | Carnivore      | RFA     |
|     | <b>Hemigymnus</b>                    |      |                |         |
| 141 | <i>Hemigymnus fasciatus</i>          | LC   | Carnivore      | RFA     |
| 142 | <i>Hemigymnus melapterus</i>         | LC   | Carnivore      | RFA     |
|     | <b>Hologymnosus</b>                  |      |                |         |
| 143 | <i>Hologymnosus annulatus</i>        | LC   | Carnivore      | RFA     |
|     | <b>Labroides</b>                     |      |                |         |
| 144 | <i>Labroides dimidiatus</i>          | LC   | Carnivore      | RFA     |
|     | <b>Macropharyngodon</b>              |      |                |         |
| 145 | <i>Macropharyngodon meleagris</i>    | LC   | Carnivore      | RFA     |
|     | <b>Novaculichthys</b>                |      |                |         |
| 146 | <i>Novaculichthys taeniourus</i>     | LC   | Carnivore      | RFA     |
|     | <b>Oxycheilinus</b>                  |      |                |         |
| 147 | <i>Oxycheilinus celebicus</i>        | LC   | Carnivore      | RFA     |
| 148 | <i>Oxycheilinus digramma</i>         | LC   | Carnivore      | BRA;RFA |
| 149 | <i>Oxycheilinus unifasciatus</i>     | LC   | Carnivore      | RFA     |
|     | <b>Stethojulis</b>                   |      |                |         |
| 150 | <i>Stethojulis bandanensis</i>       | LC   | Carnivore      | RFA     |
| 151 | <i>Stethojulis strigiventer</i>      | LC   | Carnivore      | RFA     |
|     | <b>Thalassoma</b>                    |      |                |         |
| 152 | <i>Thalassoma amblycephalum</i>      | LC   | Carnivore      | RFA     |
| 153 | <i>Thalassoma hardwicke</i>          | LC   | Carnivore      | RFA     |
| 154 | <i>Thalassoma lunare</i>             | LC   | Carnivore      | RFA     |
| 155 | <i>Thalassoma purpurum</i>           | LC   | Carnivore      | RFA     |

| No. | Class, Order, Family, Genus, Species | IUCN | Feeding habits | Habitat    |
|-----|--------------------------------------|------|----------------|------------|
| 156 | <i>Thalassoma quinquevittatum</i>    | LC   | Carnivore      | RFA        |
|     | <b>Lethrinidae</b>                   |      |                |            |
|     | <b>Gnathodentex</b>                  |      |                |            |
| 157 | <i>Gnathodentex aureolineatus</i>    | LC   | Carnivore      | RFA        |
|     | <b>Gymnocranius</b>                  |      |                |            |
| 158 | <i>Gymnocranius griseus</i>          | LC   | Carnivore      | RFA        |
|     | <b>Lethrinus</b>                     |      |                |            |
| 159 | <i>Lethrinus erythropterus</i>       | LC   | Carnivore      | RFA        |
| 160 | <i>Lethrinus harak</i>               | LC   | Carnivore      | BRA;RFA    |
| 161 | <i>Lethrinus miniatus</i>            | LC   | Carnivore      | BRA;RFA    |
| 162 | <i>Lethrinus obsoletus</i>           | LC   | Carnivore      | RFA        |
| 163 | <i>Lethrinus olivaceus</i>           | LC   | Carnivore      | RFA        |
| 164 | <i>Lethrinus rubrioperculatus</i>    | LC   | Carnivore      | RFA        |
| 165 | <i>Lethrinus variegatus</i>          | LC   | Carnivore      | RFA        |
| 166 | <i>Lethrinus xanthochilus</i>        | LC   | Carnivore      | RFA        |
|     | <b>Monotaxis</b>                     |      |                |            |
| 167 | <i>Monotaxis grandoculis</i>         | LC   | Carnivore      | RFA        |
|     | <b>Lutjanidae</b>                    |      |                |            |
|     | <b>Aphareus</b>                      |      |                |            |
| 168 | <i>Aphareus furca</i>                | LC   | Carnivore      | RFA        |
| 169 | <i>Aphareus rutilans</i>             | LC   | Carnivore      | RFA        |
|     | <b>Aprion</b>                        |      |                |            |
| 170 | <i>Aprion virescens</i>              | LC   | Carnivore      | RFA        |
|     | <b>Etelis</b>                        |      |                |            |
| 171 | <i>Etelis carbunculus</i>            | LC   | Carnivore      | BEP        |
|     | <b>Lutjanus</b>                      |      |                |            |
| 172 | <i>Lutjanus argentimaculatus</i>     | LC   | Carnivore      | BRA;RFA;OD |
| 173 | <i>Lutjanus bohar</i>                | LC   | Carnivore      | BRA;RFA    |
| 174 | <i>Lutjanus fulviflamma</i>          | LC   | Carnivore      | BRA;RFA    |
| 175 | <i>Lutjanus fulvus</i>               | LC   | Carnivore      | BRA;RFA    |
| 176 | <i>Lutjanus gibbus</i>               | LC   | Carnivore      | RFA        |
| 177 | <i>Lutjanus kasmira</i>              | LC   | Carnivore      | RFA        |
| 178 | <i>Lutjanus monostigma</i>           | LC   | Carnivore      | BRA;RFA    |
| 179 | <i>Lutjanus stellatus</i>            | NE   | Carnivore      | RFA        |
|     | <b>Macolor</b>                       |      |                |            |
| 180 | <i>Macolor niger</i>                 | LC   | Carnivore      | RFA        |
|     | <b>Paracaesio</b>                    |      |                |            |
| 181 | <i>Paracaesio sordida</i>            | LC   | Carnivore      | RFA        |
| 182 | <i>Paracaesio xanthura</i>           | LC   | Carnivore      | RFA        |
|     | <b>Pristipomoides</b>                |      |                |            |
| 183 | <i>Pristipomoides auricilla</i>      | LC   | Carnivore      | BEP        |
| 184 | <i>Pristipomoides filamentosus</i>   | LC   | Carnivore      | BEP        |
|     | <b>Symphoricichthys</b>              |      |                |            |

| No. | Class, Order, Family, Genus, Species | IUCN | Feeding habits | Habitat |
|-----|--------------------------------------|------|----------------|---------|
| 185 | <i>Symphoricichthys spilurus</i>     | LC   | Carnivore      | RFA     |
|     | Malacanthidae                        |      |                |         |
|     | <b>Malacanthus</b>                   |      |                |         |
| 186 | <i>Malacanthus brevirostris</i>      | NE   | Carnivore      | RFA     |
|     | Mullidae                             |      |                |         |
|     | <b>Mulloidichthys</b>                |      |                |         |
| 187 | <i>Mulloidichthys flavolineatus</i>  | LC   | Carnivore      | RFA     |
| 188 | <i>Mulloidichthys vanicolensis</i>   | LC   | Carnivore      | RFA     |
|     | <b>Parupeneus</b>                    |      |                |         |
| 189 | <i>Parupeneus barberinus</i>         | LC   | Carnivore      | RFA     |
| 190 | <i>Parupeneus cyclostomus</i>        | LC   | Carnivore      | RFA     |
| 191 | <i>Parupeneus indicus</i>            | LC   | Carnivore      | BRA;RFA |
| 192 | <i>Parupeneus multifasciatus</i>     | LC   | Carnivore      | RFA     |
| 193 | <i>Parupeneus pleurostigma</i>       | LC   | Carnivore      | RFA     |
| 194 | <i>Parupeneus trifasciatus</i>       | LC   | Carnivore      | RFA     |
|     | Nemipteridae                         |      |                |         |
|     | <b>Pentapodus</b>                    |      |                |         |
| 195 | <i>Pentapodus aureofasciatus</i>     | LC   | Carnivore      | RFA     |
| 196 | <i>Pentapodus caninus</i>            | LC   | Carnivore      | RFA     |
| 197 | <i>Pentapodus nagasakiensis</i>      | LC   | Carnivore      | BRA;RFA |
|     | <b>Scolopsis</b>                     |      |                |         |
| 198 | <i>Scolopsis aurata</i>              | LC   | Carnivore      | RFA     |
| 199 | <i>Scolopsis lineata</i>             | LC   | Carnivore      | RFA     |
| 200 | <i>Scolopsis trilineata</i>          | LC   | Carnivore      | RFA     |
|     | Pempheridae                          |      |                |         |
|     | <b>Pempheris</b>                     |      |                |         |
| 201 | <i>Pempheris mangula</i>             | NE   | Carnivore      | DEM     |
|     | Pentacerotidae                       |      |                |         |
|     | <b>Histioporus</b>                   |      |                |         |
| 202 | <i>Histioporus typus</i>             | NE   | Carnivore      | RFA     |
|     | Pinguipedidae                        |      |                |         |
|     | <b>Parapercis</b>                    |      |                |         |
| 203 | <i>Parapercis cylindrica</i>         | NE   | Carnivore      | RFA     |
| 204 | <i>Parapercis hexophtalma</i>        | NE   | Carnivore      | RFA     |
| 205 | <i>Parapercis pacifica</i>           | NE   | Carnivore      | BEP     |
|     | Plesiopidae                          |      |                |         |
|     | <b>Plesiops</b>                      |      |                |         |
| 206 | <i>Plesiops coeruleolineatus</i>     | LC   | Carnivore      | RFA     |
|     | Pomacanthidae                        |      |                |         |
|     | <b>Centropyge</b>                    |      |                |         |
| 207 | <i>Centropyge bispinosa</i>          | LC   | Omnivore       | RFA     |
| 208 | <i>Centropyge tibicen</i>            | LC   | Omnivore       | RFA     |
| 209 | <i>Centropyge vrolikii</i>           | LC   | Omnivore       | RFA     |



| No. | Class, Order, Family, Genus, Species   | IUCN | Feeding habits | Habitat |
|-----|----------------------------------------|------|----------------|---------|
|     | <b>Pomacanthus</b>                     |      |                |         |
| 210 | <i>Pomacanthus imperator</i>           | LC   | Omnivore       | RFA     |
| 211 | <i>Pomacanthus semicirculatus</i>      | LC   | Omnivore       | RFA     |
|     | <b>Pygoplites</b>                      |      |                |         |
| 212 | <i>Pygoplites diacanthus</i>           | LC   | Omnivore       | RFA     |
|     | Pomacentridae                          |      |                |         |
|     | <b>Abudefduf</b>                       |      |                |         |
| 213 | <i>Abudefduf septemfasciatus</i>       | LC   | Omnivore       | RFA     |
| 214 | <i>Abudefduf sordidus</i>              | LC   | Herbivore      | BRA;RFA |
| 215 | <i>Abudefduf vaigiensis</i>            | LC   | Omnivore       | RFA;OD  |
|     | <b>Amblyglyphidodon</b>                |      |                |         |
| 216 | <i>Amblyglyphidodon aureus</i>         | LC   | Omnivore       | RFA     |
|     | <b>Amphiprion</b>                      |      |                |         |
| 217 | <i>Amphiprion clarkii</i>              | NE   | Omnivore       | RFA     |
| 218 | <i>Amphiprion frenatus</i>             | LC   | Omnivore       | RFA     |
| 219 | <i>Amphiprion perideraion</i>          | LC   | Omnivore       | BRA;RFA |
|     | <b>Chromis</b>                         |      |                |         |
| 220 | <i>Chromis margaritifer</i>            | NE   | Omnivore       | RFA     |
| 221 | <i>Chromis retrofasciata</i>           | NE   | Omnivore       | RFA     |
| 222 | <i>Chromis viridis</i>                 | NE   | Omnivore       | RFA     |
|     | <b>Chrysiptera</b>                     |      |                |         |
| 223 | <i>Chrysiptera biocellata</i>          | NE   | Omnivore       | RFA     |
| 224 | <i>Chrysiptera brownriggii</i>         | NE   | Omnivore       | RFA     |
|     | <b>Dascyllus</b>                       |      |                |         |
| 225 | <i>Dascyllus aruanus</i>               | NE   | Omnivore       | RFA     |
| 226 | <i>Dascyllus melanurus</i>             | NE   | Omnivore       | RFA     |
| 227 | <i>Dascyllus trimaculatus</i>          | NE   | Omnivore       | RFA     |
|     | <b>Dischistodus</b>                    |      |                |         |
| 228 | <i>Dischistodus perspicillatus</i>     | NE   | Omnivore       | BRA;RFA |
|     | <b>Hemiglyphidodon</b>                 |      |                |         |
| 229 | <i>Hemiglyphidodon plagiometopon</i>   | NE   | Omnivore       | RFA     |
|     | <b>Neoglyphidodon</b>                  |      |                |         |
| 230 | <i>Neoglyphidodon thoracotaeniatus</i> | NE   | Omnivore       | RFA     |
|     | <b>Plectroglyphidodon</b>              |      |                |         |
| 231 | <i>Plectroglyphidodon dickii</i>       | NE   | Omnivore       | RFA     |
| 232 | <i>Plectroglyphidodon lacrymatus</i>   | NE   | Omnivore       | RFA     |
|     | <b>Pomacentrus</b>                     |      |                |         |
| 233 | <i>Pomacentrus ambionensis</i>         | NE   | Omnivore       | RFA;OD  |
| 234 | <i>Pomacentrus coelestis</i>           | NE   | Omnivore       | RFA     |
| 235 | <i>Pomacentrus pavo</i>                | NE   | Omnivore       | RFA     |
| 236 | <i>Pomacentrus tripunctatus</i>        | NE   | Omnivore       | BRA;RFA |
|     | <b>Stegastes</b>                       |      |                |         |
| 237 | <i>Stegastes fasciolatus</i>           | NE   | Omnivore       | RFA     |

| No. | Class, Order, Family, Genus, Species                                  | IUCN | Feeding habits | Habitat    |
|-----|-----------------------------------------------------------------------|------|----------------|------------|
| 238 | <i>Stegastes lividus</i><br>Priacanthidae<br><b>Heteropriacanthus</b> | NE   | Omnivore       | RFA        |
| 239 | <i>Heteropriacanthus cruentatus</i><br><b>Priacanthus</b>             | LC   | Carnivore      | RFA        |
| 240 | <i>Priacanthus hamrur</i><br>Pseudochromidae<br><b>Pseudochromis</b>  | LC   | Carnivore      | RFA        |
| 241 | <i>Pseudochromis fuscus</i><br>Scaridae<br><b>Bolbometopon</b>        | LC   | Omnivore       | RFA        |
| 242 | <i>Bolbometopon muricatum</i><br><b>Calotomus</b>                     | VU   | Herbivore      | RFA        |
| 243 | <i>Calotomus carolinus</i>                                            | LC   | Herbivore      | RFA        |
| 244 | <i>Calotomus japonicus</i>                                            | LC   | Herbivore      | RFA        |
| 245 | <i>Calotomus spinidens</i><br><b>Cetoscarus</b>                       | LC   | Herbivore      | RFA        |
| 246 | <i>Cetoscarus bicolor</i><br><b>Chlorurus</b>                         | LC   | Herbivore      | RFA        |
| 247 | <i>Chlorurus microrhinos</i>                                          | LC   | Herbivore      | RFA        |
| 248 | <i>Chlorurus sordidus</i><br><b>Hipposcarus</b>                       | LC   | Herbivore      | BRA;RFA;OD |
| 249 | <i>Hipposcarus longiceps</i><br><b>Scarus</b>                         | LC   | Herbivore      | RFA        |
| 250 | <i>Scarus chameleon</i>                                               | LC   | Herbivore      | RFA        |
| 251 | <i>Scarus dimidiatus</i>                                              | LC   | Herbivore      | BRA;RFA    |
| 252 | <i>Scarus ferrugineus</i>                                             | LC   | Herbivore      | RFA        |
| 253 | <i>Scarus festivus</i>                                                | LC   | Herbivore      | BRA;RFA    |
| 254 | <i>Scarus forsteni</i>                                                | LC   | Herbivore      | RFA        |
| 255 | <i>Scarus frenatus</i>                                                | LC   | Herbivore      | RFA        |
| 256 | <i>Scarus ghobban</i>                                                 | LC   | Herbivore      | BRA;RFA    |
| 257 | <i>Scarus globiceps</i>                                               | LC   | Herbivore      | RFA        |
| 258 | <i>Scarus niger</i>                                                   | LC   | Herbivore      | RFA        |
| 259 | <i>Scarus oviceps</i>                                                 | LC   | Herbivore      | RFA        |
| 260 | <i>Scarus prasiognathos</i>                                           | LC   | Herbivore      | RFA        |
| 261 | <i>Scarus psittacus</i>                                               | LC   | Herbivore      | RFA        |
| 262 | <i>Scarus rivulatus</i>                                               | LC   | Herbivore      | RFA        |
| 263 | <i>Scarus rubroviolaceus</i>                                          | LC   | Herbivore      | RFA        |
| 264 | <i>Scarus schlegeli</i>                                               | LC   | Herbivore      | RFA        |
| 265 | <i>Scarus tricolor</i><br>Scombridae<br><b>Grammatorcynus</b>         | LC   | Herbivore      | RFA        |
| 266 | <i>Grammatorcynus bicarinatus</i>                                     | LC   | Carnivore      | RFA;OD     |

| No. | Class, Order, Family, Genus, Species | IUCN | Feeding habits | Habitat    |
|-----|--------------------------------------|------|----------------|------------|
|     | <b>Gymnosarda</b>                    |      |                |            |
| 267 | <i>Gymnosarda unicolor</i>           | LC   | Carnivore      | RFA;OD     |
|     | <b>Rastrelliger</b>                  |      |                |            |
| 268 | <i>Rastrelliger kanagurta</i>        | DD   | Carnivore      | PE;OD      |
|     | Serranidae                           |      |                |            |
|     | <b>Aethaloperca</b>                  |      |                |            |
| 269 | <i>Aethaloperca rogaa</i>            | LC   | Carnivore      | RFA        |
|     | <b>Cephalopholis</b>                 |      |                |            |
| 270 | <i>Cephalopholis argus</i>           | LC   | Carnivore      | RFA        |
| 271 | <i>Cephalopholis leopardus</i>       | LC   | Carnivore      | RFA        |
| 272 | <i>Cephalopholis sonnerati</i>       | LC   | Carnivore      | RFA        |
| 273 | <i>Cephalopholis urodeta</i>         | LC   | Carnivore      | RFA        |
|     | <b>Epinephelus</b>                   |      |                |            |
| 274 | <i>Epinephelus coioides</i>          | LC   | Carnivore      | BRA;RFA    |
| 275 | <i>Epinephelus cyanopodus</i>        | LC   | Carnivore      | RFA        |
| 276 | <i>Epinephelus fasciatus</i>         | LC   | Carnivore      | BRA;RFA    |
| 277 | <i>Epinephelus fuscoguttatus</i>     | VU   | Carnivore      | RFA        |
| 278 | <i>Epinephelus hexagonatus</i>       | LC   | Carnivore      | RFA        |
| 279 | <i>Epinephelus latifasciatus</i>     | LC   | Carnivore      | DEM        |
| 280 | <i>Epinephelus maculatus</i>         | LC   | Carnivore      | RFA        |
| 281 | <i>Epinephelus merra</i>             | LC   | Carnivore      | RFA        |
| 282 | <i>Epinephelus poecilonotus</i>      | LC   | Carnivore      | BRA;RFA    |
| 283 | <i>Epinephelus retouti</i>           | LC   | Carnivore      | RFA        |
| 284 | <i>Epinephelus tauvina</i>           | DD   | Carnivore      | RFA;OD     |
| 285 | <i>Epinephelus trimaculatus</i>      | LC   | Carnivore      | RFA        |
|     | <b>Plectropomus</b>                  |      |                |            |
| 286 | <i>Plectropomus leopardus</i>        | LC   | Carnivore      | RFA        |
| 287 | <i>Plectropomus oligacanthus</i>     | LC   | Carnivore      | RFA        |
|     | <b>Variola</b>                       |      |                |            |
| 288 | <i>Variola albimarginata</i>         | LC   | Carnivore      | RFA        |
| 289 | <i>Variola louti</i>                 | LC   | Carnivore      | RFA        |
|     | Siganidae                            |      |                |            |
|     | <b>Siganus</b>                       |      |                |            |
| 290 | <i>Siganus argenteus</i>             | LC   | Herbivore      | RFA        |
| 291 | <i>Siganus corallinus</i>            | LC   | Herbivore      | RFA        |
| 292 | <i>Siganus fuscescens</i>            | LC   | Herbivore      | BRA;RFA;OD |
| 293 | <i>Siganus puellus</i>               | LC   | Herbivore      | RFA        |
| 294 | <i>Siganus punctatissimus</i>        | LC   | Herbivore      | RFA        |
| 295 | <i>Siganus stellatus</i>             | LC   | Herbivore      | RFA        |
| 296 | <i>Siganus vermiculatus</i>          | LC   | Herbivore      | BRA;RFA    |
| 297 | <i>Siganus virgatus</i>              | LC   | Herbivore      | BRA;RFA    |
| 298 | <i>Siganus vulpinus</i>              | LC   | Herbivore      | RFA        |
|     | Sparidae                             |      |                |            |

| No. | Class, Order, Family, Genus, Species | IUCN | Feeding habits | Habitat    |
|-----|--------------------------------------|------|----------------|------------|
|     | <b>Acanthopagrus</b>                 |      |                |            |
| 299 | <i>Acanthopagrus berda</i>           | LC   | Carnivore      | BRA;DEM;OD |
|     | Sphyraenidae                         |      |                |            |
|     | <b>Sphyraena</b>                     |      |                |            |
| 300 | <i>Sphyraena forsteri</i>            | NE   | Carnivore      | RFA        |
|     | Zanclidae                            |      |                |            |
|     | <b>Zanclus</b>                       |      |                |            |
| 301 | <i>Zanclus cornutus</i>              | LC   | Herbivore      | RFA        |
|     | <b>Pleuronectiformes</b>             |      |                |            |
|     | Bothidae                             |      |                |            |
|     | <b>Bothus</b>                        |      |                |            |
| 302 | <i>Bothus pantherinus</i>            | LC   | Carnivore      | RFA        |
|     | <b>Polymixiiformes</b>               |      |                |            |
|     | Polymixiidae                         |      |                |            |
|     | <b>Polymixia</b>                     |      |                |            |
| 303 | <i>Polymixia berndti</i>             | LC   | Carnivore      | RFA        |
|     | <b>Scorpaeniformes</b>               |      |                |            |
|     | Scorpaenidae                         |      |                |            |
|     | <b>Dendrochirus</b>                  |      |                |            |
| 304 | <i>Dendrochirus bellus</i>           | LC   | Carnivore      | DEM        |
|     | <b>Synanceia</b>                     |      |                |            |
| 305 | <i>Synanceia verrucosa</i>           | LC   | Carnivore      | RFA        |
|     | <b>Tetraodontiformes</b>             |      |                |            |
|     | Balistidae                           |      |                |            |
|     | <b>Balistapus</b>                    |      |                |            |
| 306 | <i>Balistapus undulatus</i>          | NE   | Omnivore       | RFA        |
|     | <b>Balistoides</b>                   |      |                |            |
| 307 | <i>Balistoides viridescens</i>       | NE   | Carnivore      | RFA        |
|     | <b>Melichthys</b>                    |      |                |            |
| 308 | <i>Melichthys vidua</i>              | NE   | Omnivore       | RFA        |
|     | <b>Rhinecanthus</b>                  |      |                |            |
| 309 | <i>Rhinecanthus aculeatus</i>        | NE   | Omnivore       | RFA        |
| 310 | <i>Rhinecanthus rectangulus</i>      | NE   | Omnivore       | RFA        |
|     | <b>Sufflamen</b>                     |      |                |            |
| 311 | <i>Sufflamen chrysopterum</i>        | NE   | Omnivore       | RFA        |
| 312 | <i>Sufflamen fraenatum</i>           | LC   | Omnivore       | RFA;OD     |
|     | Diodontidae                          |      |                |            |
|     | <b>Diodon</b>                        |      |                |            |
| 313 | <i>Diodon hystrix</i>                | LC   | Carnivore      | RFA        |
| 314 | <i>Diodon liturosus</i>              | NE   | Carnivore      | RFA        |
|     | Monacanthidae                        |      |                |            |
|     | <b>Aluterus</b>                      |      |                |            |
| 315 | <i>Aluterus scriptus</i>             | LC   | Herbivore      | RFA        |

| No. | Class, Order, Family, Genus, Species | IUCN | Feeding habits | Habitat     |
|-----|--------------------------------------|------|----------------|-------------|
|     | <b>Cantherhines</b>                  |      |                |             |
| 316 | <i>Cantherhines dumerilii</i>        | LC   | Omnivore       | RFA         |
| 317 | <i>Cantherhines pardalis</i>         | LC   | Omnivore       | RFA         |
|     | Ostraciidae                          |      |                |             |
|     | <b>Ostracion</b>                     |      |                |             |
| 318 | <i>Ostracion cubicus</i>             | NE   | Omnivore       | RFA         |
|     | Tetraodontidae                       |      |                |             |
|     | <b>Arothron</b>                      |      |                |             |
| 319 | <i>Arothron hispidus</i>             | LC   | Omnivore       | BRA;RFA     |
| 320 | <i>Arothron mappa</i>                | LC   | Omnivore       | RFA         |
| 321 | <i>Arothron nigropunctatus</i>       | LC   | Omnivore       | RFA         |
| 322 | <i>Arothron stellatus</i>            | LC   | Omnivore       | BRA;RFA     |
|     | <b>Chondrichthyes</b>                |      |                |             |
|     | <b>Carcharhiniformes</b>             |      |                |             |
|     | Carcharhinidae                       |      |                |             |
|     | <b>Carcharhinus</b>                  |      |                |             |
| 323 | <i>Carcharhinus amblyrhynchoides</i> | NT   | Carnivore      | PE          |
| 324 | <i>Carcharhinus falciformis</i>      | VU   | Carnivore      | RFA;OD      |
| 325 | <i>Carcharhinus longimanus</i>       | CR   | Carnivore      | PELO;OD     |
|     | <b>Galeocerdo</b>                    |      |                |             |
| 326 | <i>Galeocerdo cuvier</i>             | NT   | Carnivore      | BRA;BEP;OD  |
|     | <b>Glyphis</b>                       |      |                |             |
| 327 | <i>Glyphis gangeticus</i>            | CR   | Carnivore      | BRA;DEM;AMP |
|     | Triakidae                            |      |                |             |
|     | <b>Mustelus</b>                      |      |                |             |
| 328 | <i>Mustelus griseus</i>              | EN   | Carnivore      | DEM         |
|     | <b>Hexanchiformes</b>                |      |                |             |
|     | Hexanchidae                          |      |                |             |
|     | <b>Hexanchus</b>                     |      |                |             |
| 329 | <i>Hexanchus griseus</i>             | NT   | Carnivore      | BAD;OD      |
|     | <b>Myliobatiformes</b>               |      |                |             |
|     | Dasyatidae                           |      |                |             |
|     | <b>Dasyatis</b>                      |      |                |             |
| 330 | <i>Dasyatis sinensis</i>             | EN   | Carnivore      | DEM         |
|     | <b>Taeniura</b>                      |      |                |             |
| 331 | <i>Taeniura meyeni</i>               | VU   | Carnivore      | RFA         |
|     | <b>Urogymnus</b>                     |      |                |             |
| 332 | <i>Urogymnus asperrimus</i>          | VU   | Carnivore      | BRA;RFA     |
|     | Gymnuridae                           |      |                |             |
|     | <b>Gymnura</b>                       |      |                |             |
| 333 | <i>Gymnura japonica</i>              | VU   | Carnivore      | DEM         |
|     | <b>Rajiformes</b>                    |      |                |             |
|     | Rhynchobatidae                       |      |                |             |

| No. | Class, Order, Family, Genus, Species | IUCN | Feeding habits | Habitat |
|-----|--------------------------------------|------|----------------|---------|
|     | <b>Rhynchobatus</b>                  |      |                |         |
| 334 | <i>Rhynchobatus djiddensis</i>       | CR   | Carnivore      | BRA;RFA |
|     | <b>Squaliformes</b>                  |      |                |         |
|     | Squalidae                            |      |                |         |
|     | <b>Squalus</b>                       |      |                |         |
| 335 | <i>Squalus brevirostris</i>          | EN   | Carnivore      | DEM     |
| 336 | <i>Squalus japonicus</i>             | EN   | Carnivore      | BAD     |

Note: The Habitats are indicated as: Brackish (BRA); reef-associated (RFA); oceanodromous (OD); amphidromous (AMP); anadromous (ANA); pelagic-neritic (PE); bathypelagic (BAP); benthopelagic (BEP); pelagic-oceanic (PELO); pelagic (PEL); demersal (DEM); bathydemersal(BAD); Marine (MAR); freshwater (FRE); potamodromous (POT). The IUCN status are indicated as: Critically Endangered (CR); Endangered (EN); Vulnerable (VU); Near Threatened (NT); Least Concern (LC); Data Deficient (DD); Not Evaluated (NE).
